# Supplementary material for: Impact of Sociodemographic, Premorbid, and Injury-Related Factors on Patient-Reported Outcome Trajectories after Traumatic Brain Injury (TBI)
Source: J Clin Med. 2023 Mar 14;12(6):2246. doi: 10.3390/jcm12062246 (PMC10052290; doi:10.3390/jcm12062246)
Supplement: Supplementary file 1 [file jcm-12-02246-s001.zip › S2_Tables_S1_S2.pdf]

**Table S1.** Prediction of symptom trajectories (PHQ-9, GAD-7, PCL-5, RPQ) for the 4-class solution of model 1 (random intercept, fixed slope)

|                                                         |                                | Ref. = Stable good health     |                  |                          |              |                          |                  |
|---------------------------------------------------------|--------------------------------|-------------------------------|------------------|--------------------------|--------------|--------------------------|------------------|
|                                                         |                                | Persistent health impairments |                  | Deteriorating health     |              | Improving health         |                  |
|                                                         |                                | OR [95% CI]                   | <i>p</i>         | OR [95% CI]              | <i>p</i>     | OR [95% CI]              | <i>p</i>         |
| Age (in years)                                          |                                | <b>0.96 [0.94, 0.98]</b>      | <b>&lt;0.001</b> | 0.99 [0.97, 1.01]        | 0.258        | 0.99 [0.97, 1.00]        | 0.150            |
| Sex (ref. = Female)                                     | Male                           | 0.84 [0.57, 1.23]             | 0.366            | 0.76 [0.53, 1.09]        | 0.129        | 0.83 [0.61, 1.13]        | 0.233            |
| Education level<br>(ref. = College/university)          | None/primary school            | <b>2.65 [1.54, 4.57]</b>      | <b>&lt;0.001</b> | 1.26 [0.70, 2.27]        | 0.432        | 1.57 [0.97, 2.53]        | 0.065            |
|                                                         | At least secondary/high school | 1.49 [0.96, 2.31]             | 0.079            | 1.11 [0.72, 1.70]        | 0.644        | 1.10 [0.74, 1.63]        | 0.632            |
|                                                         | Post-high school training      | 1.25 [0.74, 2.11]             | 0.405            | 1.42 [0.89, 2.28]        | 0.142        | 1.31 [0.85, 2.03]        | 0.225            |
| Employment status<br>(ref. = Full-time employed)        | Part-time employed             | 0.76 [0.43, 1.35]             | 0.353            | <b>1.81 [1.10, 3.00]</b> | <b>0.020</b> | 0.95 [0.58, 1.58]        | 0.856            |
|                                                         | In training                    | 0.56 [0.28, 1.14]             | 0.111            | 1.26 [0.62, 2.57]        | 0.517        | 0.91 [0.49, 1.67]        | 0.750            |
|                                                         | Unemployed                     | 1.69 [0.98, 2.90]             | 0.059            | 1.52 [0.85, 2.74]        | 0.158        | 1.55 [0.95, 2.53]        | 0.078            |
|                                                         | Retired                        | 1.16 [0.58, 2.30]             | 0.678            | 0.71 [0.36, 1.40]        | 0.318        | 0.93 [0.53, 1.63]        | 0.795            |
| Marital status<br>(ref. = Married)                      | Never been married             | 0.69 [0.40, 1.19]             | 0.182            | 0.66 [0.33, 1.30]        | 0.226        | 0.90 [0.51, 1.58]        | 0.718            |
|                                                         | Living together/common law     | 1.04 [0.56, 1.91]             | 0.906            | 0.91 [0.49, 1.66]        | 0.748        | 0.80 [0.45, 1.43]        | 0.449            |
|                                                         | Divorced/separated             | 1.64 [0.89, 3.02]             | 0.115            | 1.30 [0.69, 2.45]        | 0.419        | 1.35 [0.78, 2.33]        | 0.277            |
|                                                         | Widowed                        | 0.59 [0.15, 2.38]             | 0.460            | 1.23 [0.44, 3.40]        | 0.694        | 1.06 [0.48, 2.33]        | 0.880            |
| Living alone (ref. = No)                                | Yes                            | 1.04 [0.62, 1.75]             | 0.867            | 0.82 [0.47, 1.43]        | 0.484        | 0.97 [0.61, 1.55]        | 0.904            |
| Physical health Status (ASA)<br>(ref. = Normal healthy) | Mild disease                   | 1.09 [0.70, 1.71]             | 0.688            | 1.14 [0.77, 1.71]        | 0.511        | 1.26 [0.87, 1.84]        | 0.227            |
|                                                         | Severe disease                 | 1.34 [0.68, 2.65]             | 0.402            | 1.50 [0.71, 3.15]        | 0.287        | 1.25 [0.70, 2.24]        | 0.454            |
| Psychol. problems (ref. = No)                           | Yes                            | <b>3.43 [2.18, 5.41]</b>      | <b>&lt;0.001</b> | <b>2.00 [1.20, 3.31]</b> | <b>0.007</b> | <b>2.20 [1.46, 3.30]</b> | <b>&lt;0.001</b> |
| TBI history (ref. = No)                                 | Yes                            | 0.97 [0.54, 1.71]             | 0.904            | 1.15 [0.64, 2.06]        | 0.634        | 1.13 [0.71, 1.78]        | 0.610            |
| Cause of injury<br>(ref. = Road traffic incident)       | Incidental fall                | 0.77 [0.51, 1.16]             | 0.206            | 0.73 [0.50, 1.06]        | 0.098        | 0.97 [0.69, 1.37]        | 0.857            |
|                                                         | Other                          | 0.99 [0.60, 1.64]             | 0.972            | 0.95 [0.57, 1.59]        | 0.837        | 0.79 [0.50, 1.26]        | 0.327            |
| Clinical care pathways<br>(ref. = ER)                   | Admission                      | 0.84 [0.47, 1.50]             | 0.556            | 1.52 [0.76, 3.04]        | 0.241        | 0.61 [0.37, 1.01]        | 0.052            |
|                                                         | ICU                            | 0.54 [0.23, 1.25]             | 0.150            | <b>2.45 [1.07, 5.62]</b> | <b>0.035</b> | <b>0.48 [0.24, 0.94]</b> | <b>0.034</b>     |
| Length of hospital stay (days)                          |                                | <b>0.99 [0.97, 1.00]</b>      | <b>0.033</b>     | 1.00 [1.00, 1.01]        | 0.294        | 1.00 [0.99, 1.01]        | 0.392            |
| Injury Severity Score (ISS)                             |                                | 0.99 [0.97, 1.01]             | 0.424            | 0.99 [0.97, 1.01]        | 0.172        | 1.01 [0.99, 1.02]        | 0.229            |

# Patient-reported outcome trajectories after traumatic brain injury (TBI)

|                                                            |                   |                            |                  |                          |                  |                           |                  |
|------------------------------------------------------------|-------------------|----------------------------|------------------|--------------------------|------------------|---------------------------|------------------|
| Brain Injury Score (AIS)                                   |                   | 0.88 [0.68, 1.15]          | 0.352            | 1.07 [0.86, 1.33]        | 0.560            | 1.08 [0.87, 1.33]         | 0.484            |
| TBI Severity Classification<br>(ref. = Uncomplicated mild) | Complicated mild  | 1.56 [0.94, 2.59]          | 0.086            | 1.19 [0.72, 1.97]        | 0.505            | 0.84 [0.56, 1.26]         | 0.386            |
|                                                            | Moderate          | 1.37 [0.61, 3.08]          | 0.442            | 0.91 [0.43, 1.92]        | 0.810            | 0.75 [0.37, 1.50]         | 0.414            |
|                                                            | Severe            | 1.17 [0.54, 2.55]          | 0.690            | 1.08 [0.52, 2.25]        | 0.827            | 0.78 [0.41, 1.46]         | 0.431            |
| GOSE (3 months)<br>(ref. = 7/8 (Lower/ Upper GR))          | 2/3 (VS/Lower SD) | <b>17.88 [8.45, 37.85]</b> | <b>&lt;0.001</b> | <b>3.15 [1.55, 6.41]</b> | <b>0.002</b>     | <b>7.29 [4.00, 13.31]</b> | <b>&lt;0.001</b> |
|                                                            | 4 (Upper SD)      | <b>18.42 [9.84, 34.47]</b> | <b>&lt;0.001</b> | <b>3.88 [2.24, 6.69]</b> | <b>&lt;0.001</b> | <b>5.62 [3.25, 9.71]</b>  | <b>&lt;0.001</b> |
|                                                            | 5 (Lower MD)      | <b>11.12 [5.92, 20.89]</b> | <b>&lt;0.001</b> | <b>3.92 [2.27, 6.77]</b> | <b>&lt;0.001</b> | <b>5.74 [3.22, 10.22]</b> | <b>&lt;0.001</b> |
|                                                            | 6 (Upper MD)      | <b>5.10 [2.93, 8.88]</b>   | <b>&lt;0.001</b> | <b>2.88 [1.77, 4.68]</b> | <b>&lt;0.001</b> | <b>5.07 [3.39, 7.58]</b>  | <b>&lt;0.001</b> |

Note. SD = Severe disability, MD = moderate disability, GR = good recovery, OR = Odds Ratio, CI = confidence interval, p = p-value. Values in **bold** are significant at p < 0.05.

**Table S2.** Prediction of quality of life trajectories (QOLIBRI-OS, SF-12 MCS, SF-12 PCS) for the 4-class solution of model 1 (random intercept, fixed slope).

|                                                         |                                | Ref. = Stable good health     |                  |                      |          |                          |              |
|---------------------------------------------------------|--------------------------------|-------------------------------|------------------|----------------------|----------|--------------------------|--------------|
|                                                         |                                | Persistent health impairments |                  | Deteriorating health |          | Improving health         |              |
|                                                         |                                | OR [95% CI]                   | <i>p</i>         | OR [95% CI]          | <i>p</i> | OR [95% CI]              | <i>p</i>     |
| Age (in years)                                          |                                | 1.00 [0.98, 1.01]             | 0.465            | 1.00 [0.97, 1.03]    | 0.932    | 1.00 [0.98, 1.03]        | 0.759        |
| Sex (ref. = Female)                                     | Male                           | <b>0.61 [0.48, 0.79]</b>      | <b>&lt;0.001</b> | 1.08 [0.63, 1.85]    | 0.779    | <b>0.50 [0.29, 0.85]</b> | <b>0.010</b> |
| Education level<br>(ref. = College/university)          | None/primary school            | <b>2.26 [1.53, 3.36]</b>      | <b>&lt;0.001</b> | 1.79 [0.82, 3.91]    | 0.145    | 1.36 [0.66, 2.79]        | 0.407        |
|                                                         | At least secondary/high school | <b>1.53 [1.11, 2.11]</b>      | <b>0.010</b>     | 1.38 [0.74, 2.57]    | 0.312    | 0.73 [0.38, 1.38]        | 0.331        |
|                                                         | Post-high school training      | <b>1.56 [1.11, 2.20]</b>      | <b>0.011</b>     | 1.23 [0.60, 2.49]    | 0.570    | 1.27 [0.65, 2.49]        | 0.482        |
| Employment status<br>(ref. = Full-time employed)        | Part-time employed             | 0.95 [0.66, 1.39]             | 0.805            | 1.21 [0.55, 2.63]    | 0.637    | 1.28 [0.58, 2.82]        | 0.542        |
|                                                         | In training                    | 0.56 [0.30, 1.04]             | 0.066            | 0.27 [0.01, 6.30]    | 0.417    | 1.69 [0.57, 4.99]        | 0.339        |
|                                                         | Unemployed                     | <b>1.87 [1.25, 2.80]</b>      | <b>0.002</b>     | 1.69 [0.74, 3.86]    | 0.216    | 1.41 [0.56, 3.51]        | 0.465        |
|                                                         | Retired                        | 0.68 [0.44, 1.07]             | 0.098            | 0.71 [0.30, 1.69]    | 0.443    | 0.94 [0.38, 2.36]        | 0.900        |
| Marital status<br>(ref. = Married)                      | Never been married             | 0.73 [0.48, 1.10]             | 0.136            | 1.00 [0.42, 2.39]    | 0.997    | 0.71 [0.30, 1.72]        | 0.452        |
|                                                         | Living together/common law     | 1.07 [0.69, 1.66]             | 0.752            | 0.67 [0.27, 1.67]    | 0.384    | 0.64 [0.14, 2.93]        | 0.566        |
|                                                         | Divorced/separated             | 1.14 [0.72, 1.78]             | 0.579            | 0.54 [0.11, 2.65]    | 0.446    | 1.11 [0.47, 2.62]        | 0.820        |
|                                                         | Widowed                        | 1.48 [0.81, 2.69]             | 0.198            | 2.49 [0.85, 7.29]    | 0.095    | 0.41 [0.01, 15.86]       | 0.633        |
| Living alone (ref. = No)                                | Yes                            | <b>1.60 [1.11, 2.30]</b>      | <b>0.011</b>     | 0.99 [0.47, 2.06]    | 0.978    | 1.48 [0.72, 3.03]        | 0.287        |
| Physical health Status (ASA)<br>(ref. = Normal healthy) | Mild disease                   | 1.17 [0.86, 1.59]             | 0.307            | 1.17 [0.65, 2.14]    | 0.598    | 1.27 [0.71, 2.27]        | 0.416        |
|                                                         | Severe disease                 | <b>2.22 [1.36, 3.64]</b>      | <b>0.001</b>     | 1.49 [0.56, 3.97]    | 0.427    | 1.45 [0.56, 3.74]        | 0.445        |
| Psychol. problems (ref. = No)                           | Yes                            | <b>2.25 [1.59, 3.19]</b>      | <b>&lt;0.001</b> | 1.41 [0.70, 2.85]    | 0.335    | <b>2.57 [1.37, 4.83]</b> | <b>0.003</b> |
| TBI history (ref. = No)                                 | Yes                            | 0.96 [0.63, 1.47]             | 0.864            | 1.62 [0.79, 3.33]    | 0.187    | 1.46 [0.66, 3.26]        | 0.351        |
| Cause of injury<br>(ref. = Road traffic incident)       | Incidental fall                | 0.82 [0.62, 1.10]             | 0.190            | 0.60 [0.36, 1.02]    | 0.059    | 0.97 [0.55, 1.71]        | 0.912        |
|                                                         | Other                          | 0.88 [0.60, 1.30]             | 0.525            | 0.52 [0.24, 1.12]    | 0.094    | 1.07 [0.44, 2.56]        | 0.887        |
| Clinical care pathways<br>(ref. = ER)                   | Admission                      | 0.71 [0.47, 1.09]             | 0.116            | 3.62 [0.79, 16.61]   | 0.098    | 2.12 [0.27, 16.97]       | 0.477        |
|                                                         | ICU                            | 0.63 [0.35, 1.15]             | 0.134            | 4.41 [0.80, 24.30]   | 0.088    | 2.51 [0.26, 24.62]       | 0.428        |
| Length of hospital stay (days)                          |                                | 1.00 [0.99, 1.01]             | 0.741            | 1.00 [0.99, 1.02]    | 0.478    | <b>0.98 [0.97, 1.00]</b> | <b>0.048</b> |
| Injury Severity Score (ISS)                             |                                | 1.00 [0.99, 1.02]             | 0.762            | 0.98 [0.96, 1.01]    | 0.212    | 1.01 [0.99, 1.03]        | 0.346        |

# Patient-reported outcome trajectories after traumatic brain injury (TBI)

|                                                            |                   |                             |                  |                          |              |                            |                  |
|------------------------------------------------------------|-------------------|-----------------------------|------------------|--------------------------|--------------|----------------------------|------------------|
| Brain Injury Score (AIS)                                   |                   | 0.95 [0.80, 1.13]           | 0.549            | 0.94 [0.68, 1.32]        | 0.738        | 1.19 [0.84, 1.69]          | 0.324            |
| TBI Severity Classification<br>(ref. = Uncomplicated mild) | Complicated mild  | 0.93 [0.65, 1.32]           | 0.666            | 1.19 [0.60, 2.37]        | 0.612        | 0.61 [0.28, 1.33]          | 0.212            |
|                                                            | Moderate          | 0.86 [0.50, 1.49]           | 0.598            | 1.22 [0.31, 4.80]        | 0.778        | 0.90 [0.30, 2.67]          | 0.845            |
|                                                            | Severe            | 0.79 [0.47, 1.31]           | 0.358            | 1.52 [0.52, 4.47]        | 0.443        | 0.76 [0.28, 2.04]          | 0.579            |
| GOSE (3 months)<br>(ref. = 7/8 (Lower/ Upper GR))          | 2/3 (VS/Lower SD) | <b>27.24 [15.71, 47.22]</b> | <b>&lt;0.001</b> | <b>3.92 [1.63, 9.43]</b> | <b>0.002</b> | <b>24.32 [9.93, 59.54]</b> | <b>&lt;0.001</b> |
|                                                            | 4 (Upper SD)      | <b>13.47 [8.70, 20.84]</b>  | <b>&lt;0.001</b> | 1.97 [0.91, 4.27]        | 0.086        | <b>5.94 [2.25, 15.74]</b>  | <b>&lt;0.001</b> |
|                                                            | 5 (Lower MD)      | <b>7.24 [4.60, 11.41]</b>   | <b>&lt;0.001</b> | 1.60 [0.65, 3.96]        | 0.305        | <b>5.93 [2.22, 15.83]</b>  | <b>&lt;0.001</b> |
|                                                            | 6 (Upper MD)      | <b>4.23 [2.90, 6.15]</b>    | <b>&lt;0.001</b> | 1.61 [0.83, 3.09]        | 0.157        | <b>5.60 [2.70, 11.59]</b>  | <b>&lt;0.001</b> |

Note. SD = Severe disability, MD = moderate disability, GR = good recovery, OR = Odds Ratio, CI = confidence interval, p = p-value. Values in **bold** are significant at p < 0.05.
